# Supplementary material for: The Construction of Identities in the Pre-Service Training of Social Sciences Teachers
Source: MDPI journal article supplement (doi:10.3390/soc12050138), 2022-10-02
Supplement: s1 [file s1]

Archive with 1 entries (1 files):
- societies-1954020-supplementary.pdf
